# Supplementary material
Source: PubMed Central journal article supplement (PMC3403468)
Supplement: pro0021-0707-SD1.pdf [file pro0021-0707-SD1.pdf]

# Figure S1

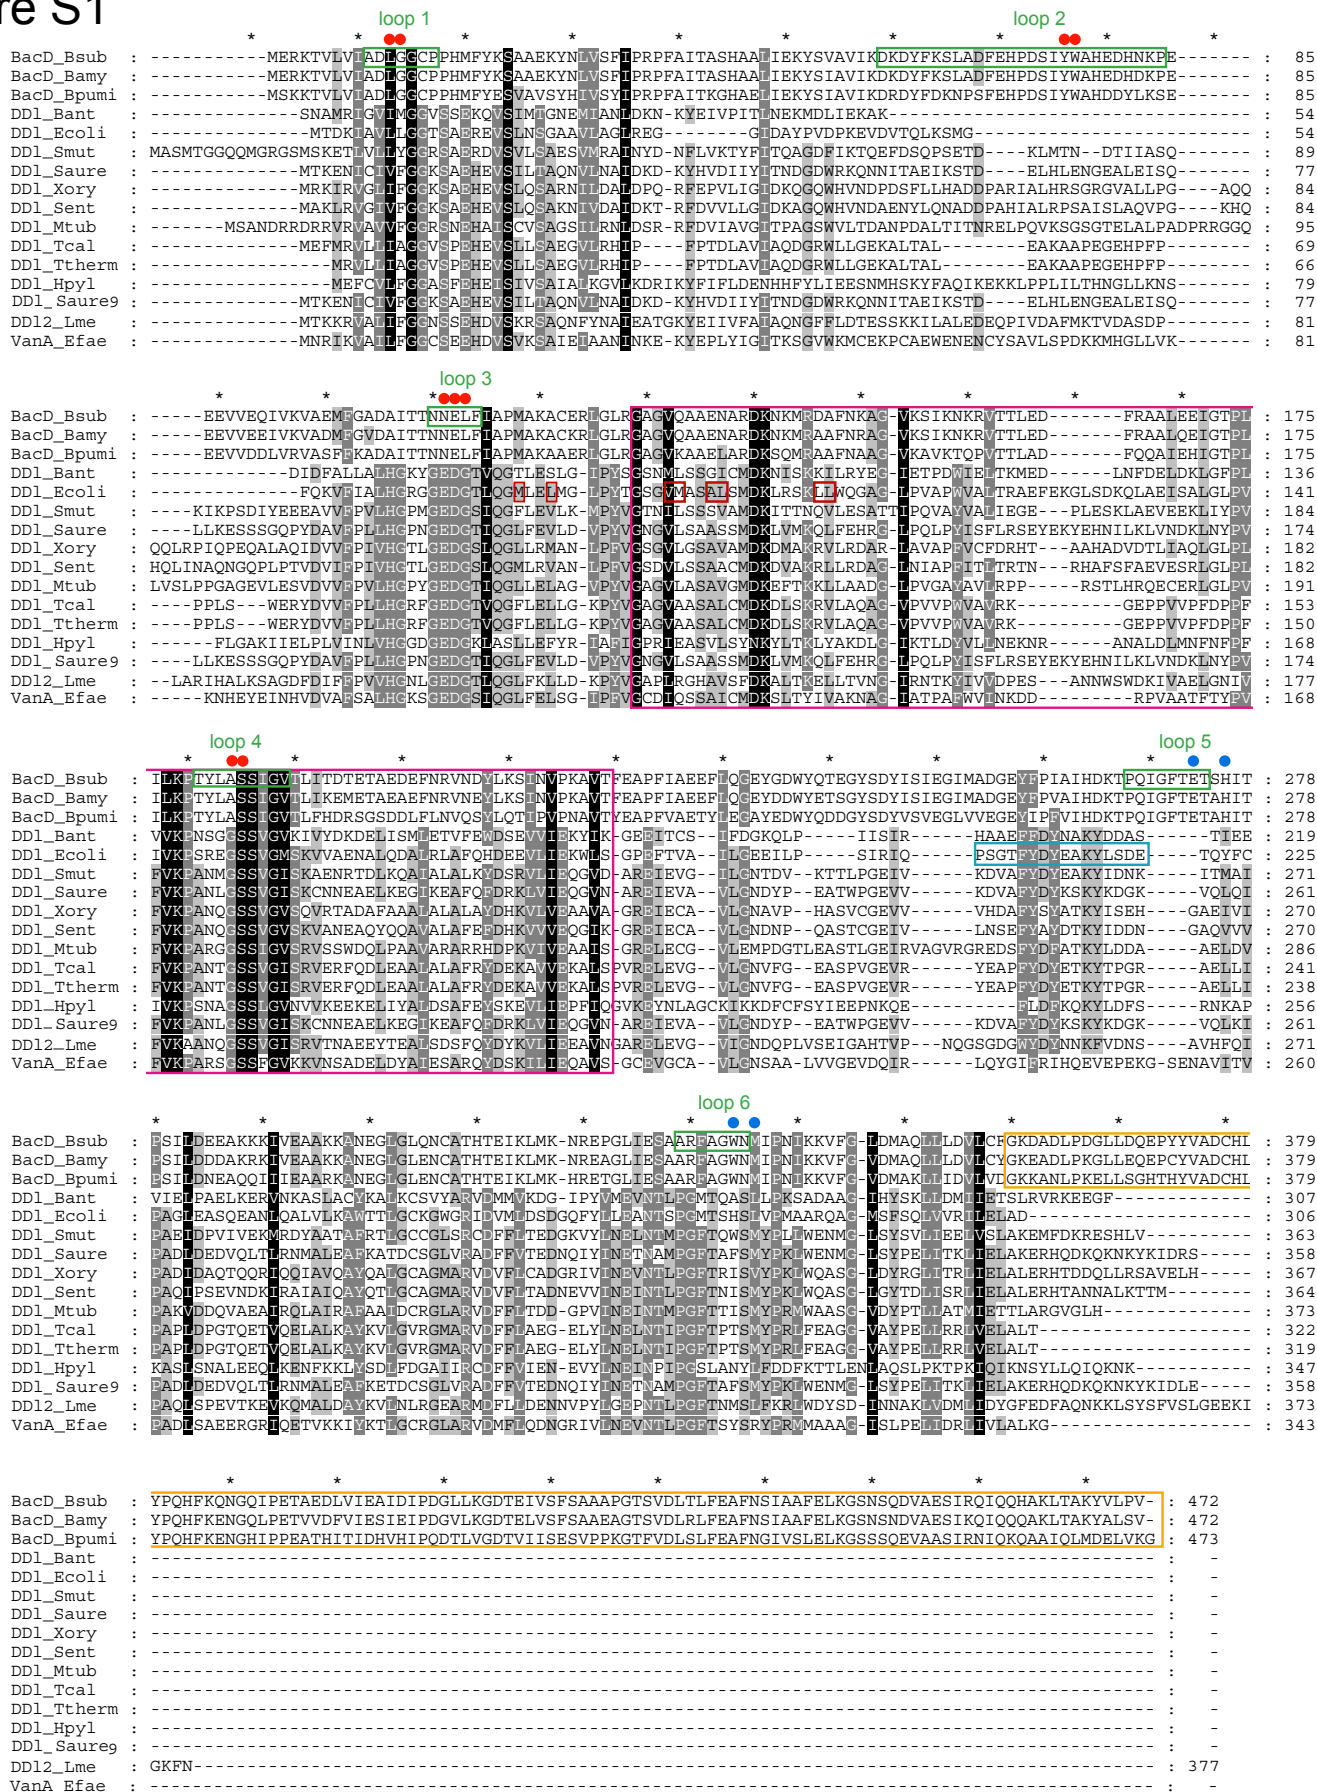

**Figure S1.** Amino acid sequence alignment of BacD and its homologues. The  $\omega$ -loop and the residues involved in dimerization of DdlB from *E. coli* are enclosed with cyan and brown rectangles, respectively. The consensus ATP-grasp domains and the BacD-specific insertions are shown with the pink and yellow rectangles, respectively. Six loops interacting with amino-acid substrates in BacD are indicated and labeled with green. The residues around the side chains of the N-terminal and C-terminal amino-acid substrates, are marked with the blue and red circles, respectively. The sequences (and gene/PDB ID) shown are BacD from *Bacillus subtilis* (BacD\_Bsub: NP\_391651), BacD from *Bacillus amyloliquefaciens* DSM 7 (BacD\_Bamy: CBI\_44730), BacD from *Bacillus pumilus* ATCC 7061 (BacD\_Bpumi: ZP\_03055035), Ddl from *Bacillus anthracis* (DDI\_Bant: 3R23), Ddl from *E. coli* (DDI\_Ecoli: 2DLN), Ddl from *Streptococcus mutans* (DDI\_Smut: 3K3P), Ddl from *Staphylococcus aureus* (DDI\_Saure: 2187), Ddl from *Xanthomonas oryzae* pv. *oryzae* KACC10331 (DDI\_Xory: 3E5N), Ddl from *Salmonella enterica* (DDI\_Sent: 3I12), Ddl from *Mycobacterium tuberculosis* (DDI\_Mtub: 3LWB), Ddl from *Thermus caldophilus* (DDI\_Tcal: 2FB9), Ddl from *Thermus thermophilus* HB8 (DDI\_Ttherm: 2YZG), Ddl from *Helicobacter pylori* (DDI\_Hpyl: 2PVP), Ddl from *Staphylococcus aureus* (VRSA-9) (DDI\_Saure9: 3N8D), Ddl from *Leuconostoc mesenteroides* (DDI2\_Lme: 1EH1), and VanA from *Enterococcus faecium* BM4147 (VanA\_Efae: 1E4E).

Figure S2

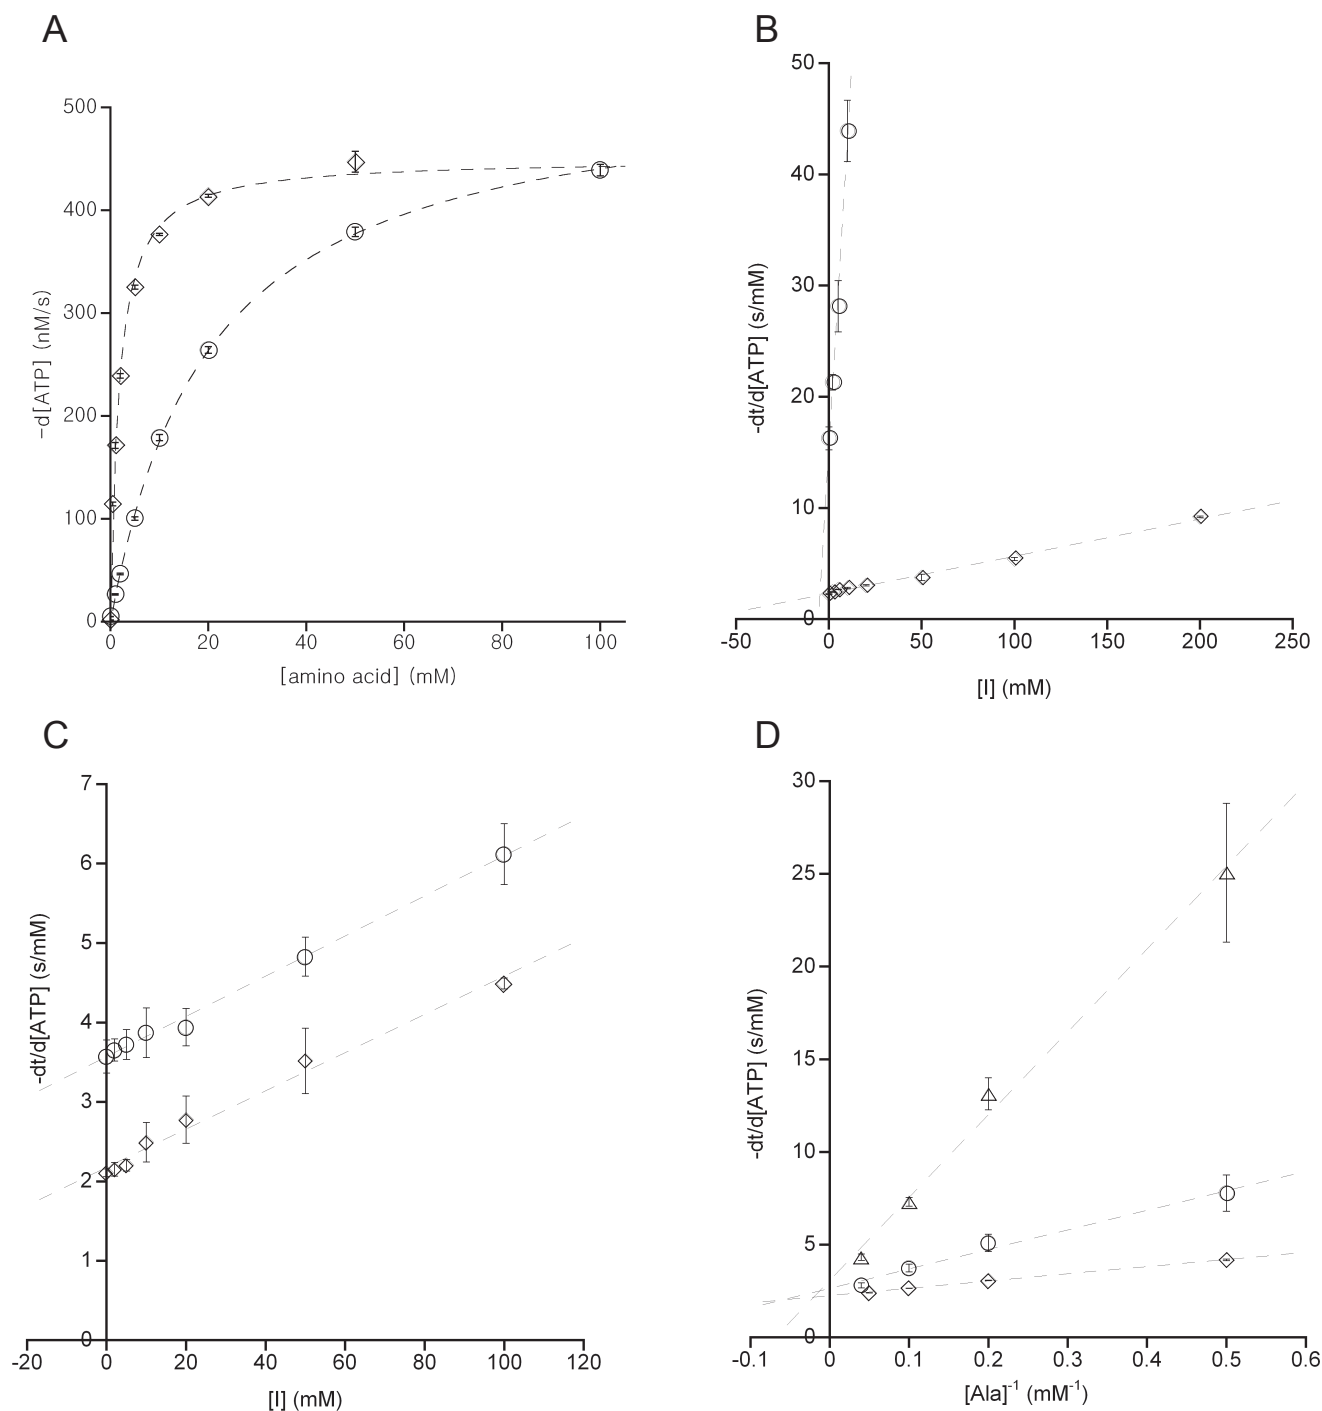

**Figure S2.** Enzymatic characterization of BacD. A: Rates of ATP hydrolysis were plotted against concentration of L-alanine (open square) and L-phenylalanine (open circle), where 100 mM L-phenylalanine and 25 mM L-alanine were included, respectively. Measurements were repeated at least three times and the standard deviations are indicated with error bars. Dashed lines show curve fittings with the Michaelis-Menten equation. B: Dixon plots are shown for the measurements in a range of concentrations of the phosphinate L-alanyl-L-phenylalanine analog, where 2 mM L-alanine and 100 mM L-phenylalanine (open circle) or 25 mM L-alanine and 100 mM L-phenylalanine (open square) were included. C: Dixon plots are shown as in B, but 25 mM L-alanine and 20 mM L-phenylalanine (open circle) or 25 mM L-alanine and 100 mM L-phenylalanine (open square) were included. D: Lineweaver-Burk plot is shown in a range of concentrations of L-alanine, where 100 mM L-phenylalanine and 0 mM (open square), 20 mM (open circle), or 100 mM (open triangle) of the phosphinate L-alanyl-L-phenylalanine analog were included.

Figure S3

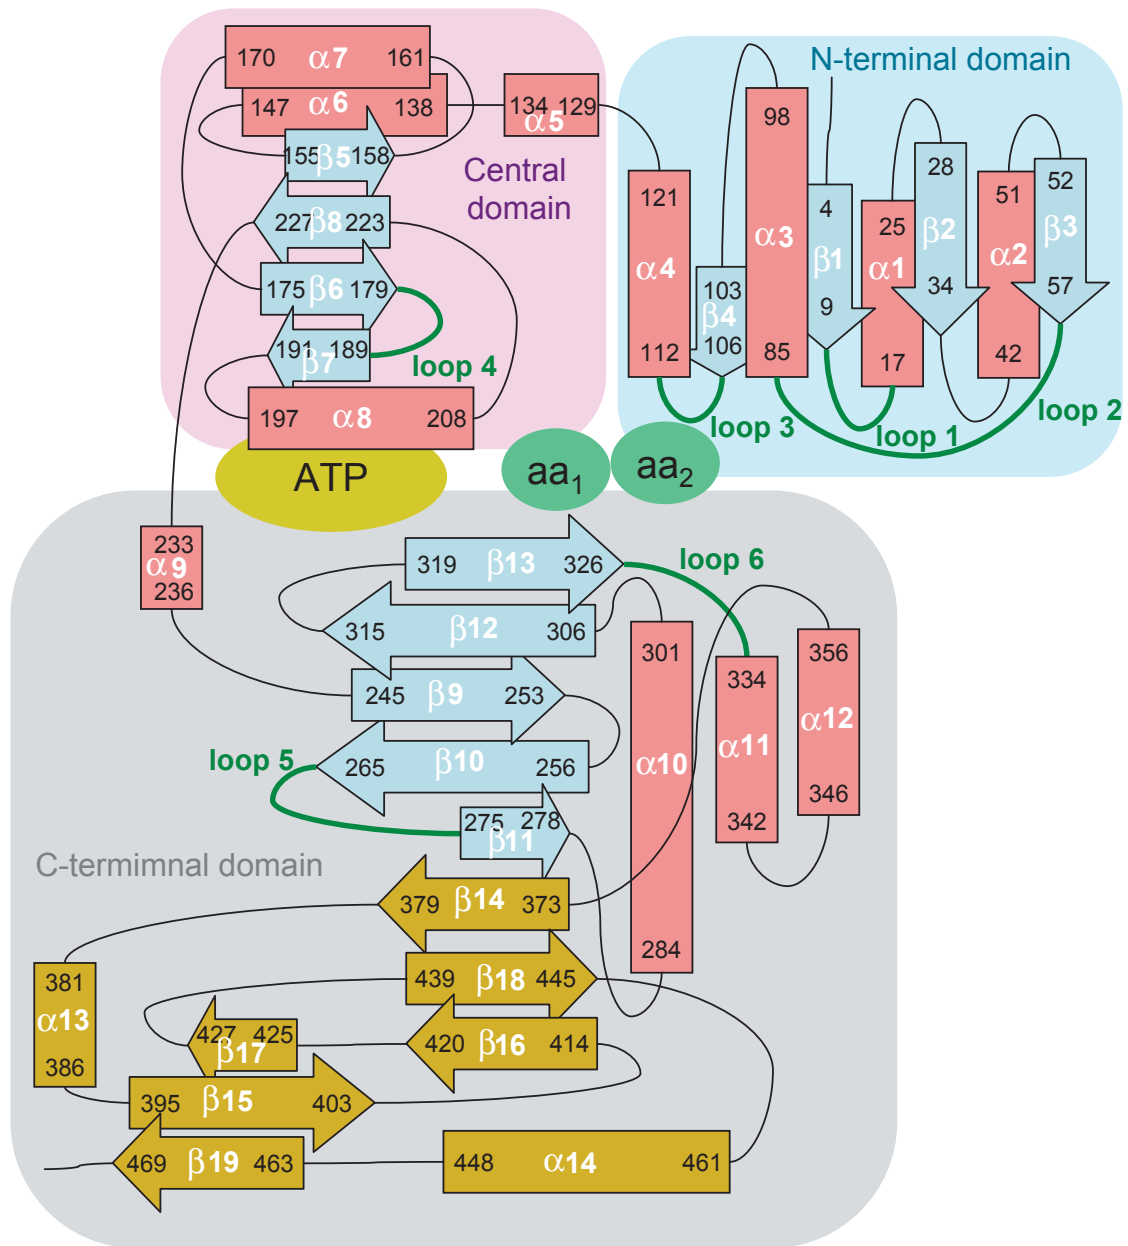

**Figure S3. Topology diagram of BacD.**  $\alpha$ -helices ( $\alpha 1$ - $\alpha 14$ ) and  $\beta$ -strands ( $\beta 1$ - $\beta 19$ ) are shown in rectangles and arrows, respectively. The residue of start and end in each element are numbered. The approximate positions for ATP, first amino acid ( $aa_1$ ), and second amino acid ( $aa_2$ ) are indicated. The loops involved in the formation of the amino-acid binding site are labeled "loop 1-6". The BacD-specific region at the C-terminal domain is shown with yellow.

**Table S1. Primer sequences used for cloning and site-directed mutagenesis**

| <b>Primer</b>          | <b>Sequence 5'–3'</b>                       |
|------------------------|---------------------------------------------|
| Cloning                |                                             |
| Forward with NcoI site | TAATACACCATGGAGAGAAAAACAGTATTGG             |
| Reverse with XhoI site | AATACTCGAGTCATACTGGCAGCACATACTTTGCC         |
| Mutagenesis            |                                             |
| Tyr75Phe-1             | ATTCCATTTTTTGGGCGCATGAAGATCATAACAAGCCTGAGG  |
| Tyr75Phe-2             | TGCGCCCAAAAAATGGAATCAGGGTGTTCAAAATCAGCTAAAC |
| Tyr75Phe-3             | TGAAGATCATAACAAGCCTGAGG                     |
| Tyr75Phe-4             | CAGGGTGTTCAAAATCAGCTAAAC                    |
| Ser185Ala-1            | ACTTAGCGGCTTCTATCGGTGTAACGCTGATTACGGACTG    |
| Ser185Ala-2            | CGATAGAAGCCGCTAAGTATGTAGGCTTTAAGATAAGAGGTG  |
| Ser185Ala-3            | GTGTAACGCTGATTACGGACTG                      |
| Ser185Ala-4            | ATGTAGGCTTTAAGATAAGAGGTG                    |
